# Supplementary material for: Navigating Treatment Selection in Acute Severe Ulcerative Colitis: A Prospective Mixed Method Analysis of Factors Influencing Patient Decision Making
Source: Research Square preprint supplement (doi:10.21203/rs.3.rs-9308389/v1), 2026-04-15
Supplement: Supplementary file 1 [file e6f3c16ed93c797e33d1710d.pdf]

# Interview Guide

Supplemental Figure 1

## Understanding Therapy Preferences

**What factors are most important to you when selecting a therapy for your condition?**

- **Probes: Effectiveness, side effects, administration route, cost, etc.**

**Can you describe your thoughts on corticosteroids, infliximab, upadacitinib? What do you like or dislike about each option?**

- **Probes: Previous experiences, perceived benefits, concerns about side effects.**

**How do you prioritize these factors when making a decision about your treatment?**

- **Probes: Are there any deal-breakers for you?**

## Engagement in Decision-Making

**What factors are most important to you when selecting a therapy for your condition?**

- **Probes: Effectiveness, side effects, administration route, cost, etc.**

**Can you describe a time when you felt particularly engaged or disengaged in a treatment decision? What contributed to that feeling?**

- **Probes: Specific interactions with healthcare providers, information received**

## Patient Selection

**What therapy would you select and why?**

## **Feedback on Educational Materials and Engagement**

**What are your thoughts on the educational materials provided to you about these therapies?**

- **Probes: Clarity, usefulness, comprehensiveness.**

**How did the materials influence your understanding of your treatment options?**

- **Probes: Did they help you feel more informed or confident in your decision?**

**What additional information or support would you find helpful in making your treatment decision?**

- **Probes: More detailed explanations, personal stories, peer support.**

**Can you tell me about one slide you found helpful and why?**

**Can you tell me about one slide you did not find helpful and why?**

**Is there anything you would suggest changing or adding to the materials to better support patients like you?**

- **Probes: Additional topics, different formats, more interactive elements.**
